# Supplementary material
Source: PubMed Central journal article supplement (PMC3758251)
Supplement: NIHMS495739-supplement-Smoker_s_Profile_Form.pdf [file NIHMS495739-supplement-Smoker_s_Profile_Form.pdf]

Date    /    /   

Subject #

|  |  |  |  |
|--|--|--|--|
|  |  |  |  |
|--|--|--|--|

**BASELINE**

**SMOKER'S PROFILE**

Age:        Gender: M F

Ethnicity:                            Weight:        lbs. Height:        Occupation:                           

Marital Status:    Single    Married    Divorced/Separated    Widower

Circle Highest Completed School Grade:

1 2 3 4 5 6 7 8 9 10 11 12 College: 1 2 3 4 Graduate School: 1 2 3 4 5

Circle your Mother's Highest Completed School Grade:

1 2 3 4 5 6 7 8 9 10 11 12 College: 1 2 3 4 Graduate School: 1 2 3 4 5

Number of persons living in your household who smoke (including yourself):                           

|                                                                                                                             |
|-----------------------------------------------------------------------------------------------------------------------------|
| On an average day, how many cigarettes do you usually smoke? <u>                          </u>                              |
| Which brand do you most frequently smoke? <u>                          </u> ( ) Regular ( ) Lights ( ) 100's                |
| What other brand(s) do you currently smoke? <u>                          </u>                                               |
| How many years have you been smoking? <u>                          </u>                                                     |
| How deeply do you inhale the smoke? <u>  </u> Not at all <u>  </u> Somewhat <u>  </u> Deeply <u>  </u> Very Deeply          |
| How many different times in your life have you made a serious attempt to quit smoking? <u>                          </u>    |
| How many different organized programs have you attended to help you quit smoking? <u>                          </u>         |
| What is the longest single period of time you have stayed away from cigarettes? (record numbers)                            |
| <u>  </u> Years <u>  </u> Months <u>  </u> Weeks <u>  </u> Days <u>  </u> None                                              |
| If you have previously quit, did you experience any unpleasant effects as a result? <u>  </u> Yes <u>  </u> No              |
| If yes, please explain: <u>                          </u>                                                                   |
| <u>                          </u>                                                                                           |
| How severe were these effects? <u>  </u> Very Mild <u>  </u> Mild <u>  </u> Moderate <u>  </u> Severe <u>  </u> Very Severe |

Do you smoke primarily menthol or non-menthol (>80%) cigarettes?    Menthol    Non-Menthol

Have you had a physical examination by a physician in the last year?    Yes    No

Do you have any medical problems?    Yes    No If yes, please explain:

                          

                          

   Heart Disease    Lung Cancer    Bronchitis    Emphysema    Asthma  
   High Blood Pressure    Stomach Problems    Diabetes    None

Are you on medication?    Yes    No If yes, please explain:

How many cups of the following beverages do you drink on any average day (approximately)?

Coffee: \_\_\_\_\_

**How many of those cups of coffee are:**

\_\_\_\_\_ Brewed \_\_\_\_\_ Instant \_\_\_\_\_ Decaffeinated

Tea (caffeinated): \_\_\_\_\_ Cola Drinks (caffeinated): \_\_\_\_\_

How many alcoholic drinks do you have per week? \_\_\_\_\_

**How many of those alcoholic drinks are :**

\_\_\_\_\_ Beer \_\_\_\_\_ Wine \_\_\_\_\_ Hard Liquor

When do you usually have these drinks? \_\_\_\_\_ Mornings \_\_\_\_\_ Afternoons \_\_\_\_\_ Evenings

Have you ever tried or used any tobacco product(s) other than cigarettes? \_\_\_\_\_ Yes \_\_\_\_\_ No

If yes, circle the types of products you've ever tried/used:    cigars    pipe    chewing tobacco

How many (or how much) of the above product(s) have you used in your lifetime? \_\_\_\_\_

How long ago did you last use the above product(s)? \_\_\_\_\_
