# Supplementary material
Source: PubMed Central journal article supplement (PMC3758251)
Supplement: NIHMS495739-supplement-Urge_to_Smoke_Scale.pdf [file NIHMS495739-supplement-Urge_to_Smoke_Scale.pdf]

Subject ID:

Time:            Pre Scan                      Break                      Post Scan

## Urge to Smoke Scale +

|                                                                       | Definitely Not |   |   | Possibly |   | Definitely |   |
|-----------------------------------------------------------------------|----------------|---|---|----------|---|------------|---|
|                                                                       | 1              | 2 | 3 | 4        | 5 | 6          | 7 |
| 1. If you could smoke freely, would you like a cigarette this minute? |                |   |   |          |   |            |   |
| 2. Do you have an urge for a cigarette right now?                     |                |   |   |          |   |            |   |
| 3. Do you miss a cigarette?                                           |                |   |   |          |   |            |   |
| 4. I crave a cigarette right now.                                     |                |   |   |          |   |            |   |
| 5. I am going to smoke as soon as possible.                           |                |   |   |          |   |            |   |
| 6. All I want right now is a cigarette.                               |                |   |   |          |   |            |   |
| 7. I want to smoke now.                                               |                |   |   |          |   |            |   |
| 8. I have a desire for a cigarette now.                               |                |   |   |          |   |            |   |
| 9. Nothing would be better than smoking a cigarette right now.        |                |   |   |          |   |            |   |
| 10. Smoking a cigarette would be pleasant.                            |                |   |   |          |   |            |   |
